# Supplementary material for: A Relationship Between Early Language Skills and Adult Autistic-Like Traits: Evidence from a Longitudinal Population-Based Study
Source: Springer Nature journal article supplement (doi:10.1007/s10803-016-3014-z), 2017-02-27
Supplement: MOESM1 [file 12093338]

Online supplemental material 1

Characteristics of participants in the Raine cohort who were ‘Included’ (n = 644) and were ‘Not Included’ (n = 2032) in the current studya

|  | Included  (*n* = 644) |  | Not Included  (*n* = 2032) | *p* |
| --- | --- | --- | --- | --- |
| *n* (%) |  | *n* (%) |
| Maternal age |  |  |  |  |
| <20 years | 31 (4.9) |  | 239 (12.1) |  |
| 20-34 years | 478 (75.9) |  | 1527 (77.0) |  |
| 35+ years | 121 (19.2) |  | 216 (10.9) | <.001 |
| Maternal education |  |  |  |  |
| Incomplete secondary school (< 12 years) | 323 (51.4) |  | 1306 (66.0) |  |
| Complete secondary school (12 years) | 306 (48.6) |  | 672 (34.0) | <.001 |
| Maternal race |  |  |  |  |
| Non-Caucasian | 53 (8.4) |  | 182 (9.2) |  |
| Caucasian | 577 (91.6) |  | 1800 (90.8) | .556 |
| Maternal smoking in pregnancy |  |  |  |  |
| 1-10 cigarettes daily | 75 (11.9) |  | 351 (17.7) |  |
| 10+ cigarettes daily | 49 (7.8) |  | 262 (13.2) |  |
| No | 506 (80.3) |  | 1369 (69.1) | <.001 |
| Paternal age |  |  |  |  |
| < 19 years | 13 (2.1) |  | 110 (5.5) |  |
| 20-34 years | 426 (67.6) |  | 1435 (72.4) |  |
| 35+ years | 191 (30.3) |  | 437 (22.1) | <.001 |
| Paternal education |  |  |  |  |
| Incomplete secondary school (< 12 years) | 276 (50.2) |  | 1002 (64.9) |  |
| Complete secondary school (12 years) | 274 (49.8) |  | 541 (35.1) | <.001 |
| Family income below poverty line |  |  |  |  |
| Yes (<$24,000) | 177 (29.0) |  | 887 (47.9) |  |
| No (>$24,000) | 433 (71.0) |  | 966 (52.1) | <.001 |
| Gestational age |  |  |  |  |
| <37 weeks | 60 (9.3) |  | 240 (11.8) |  |
| >37 weeks | 584 (90.7) |  | 1792 (88.2) | .080 |
| Birthweight |  |  |  |  |
| <2,500g | 45 (7.0) |  | 195 (9.6) |  |
| >2,500g | 597 (93.0) |  | 1829 (90.4) | .043 |
| Sex |  |  |  |  |
| Male | 308 (47.8) |  | 1059 (52.1) |  |
| Female | 336 (52.2) |  | 973 (47.9) | .058 |

*Note:* *p*-values are for Chi-squared analyses; bold values indicate statistical significance (p< .05)

a Sample restricted to participants who met the inclusionary criteria for the study and had both Language Development Survey and AQ data available.
